# Supplementary material for: Environmental systems biology of cold-tolerant phenotype in Saccharomyces species adapted to grow at different temperatures
Source: PubMed Central journal article supplement (PMC4283049; doi:10.1111/mec.12930), 2014-10-21

Figure S3

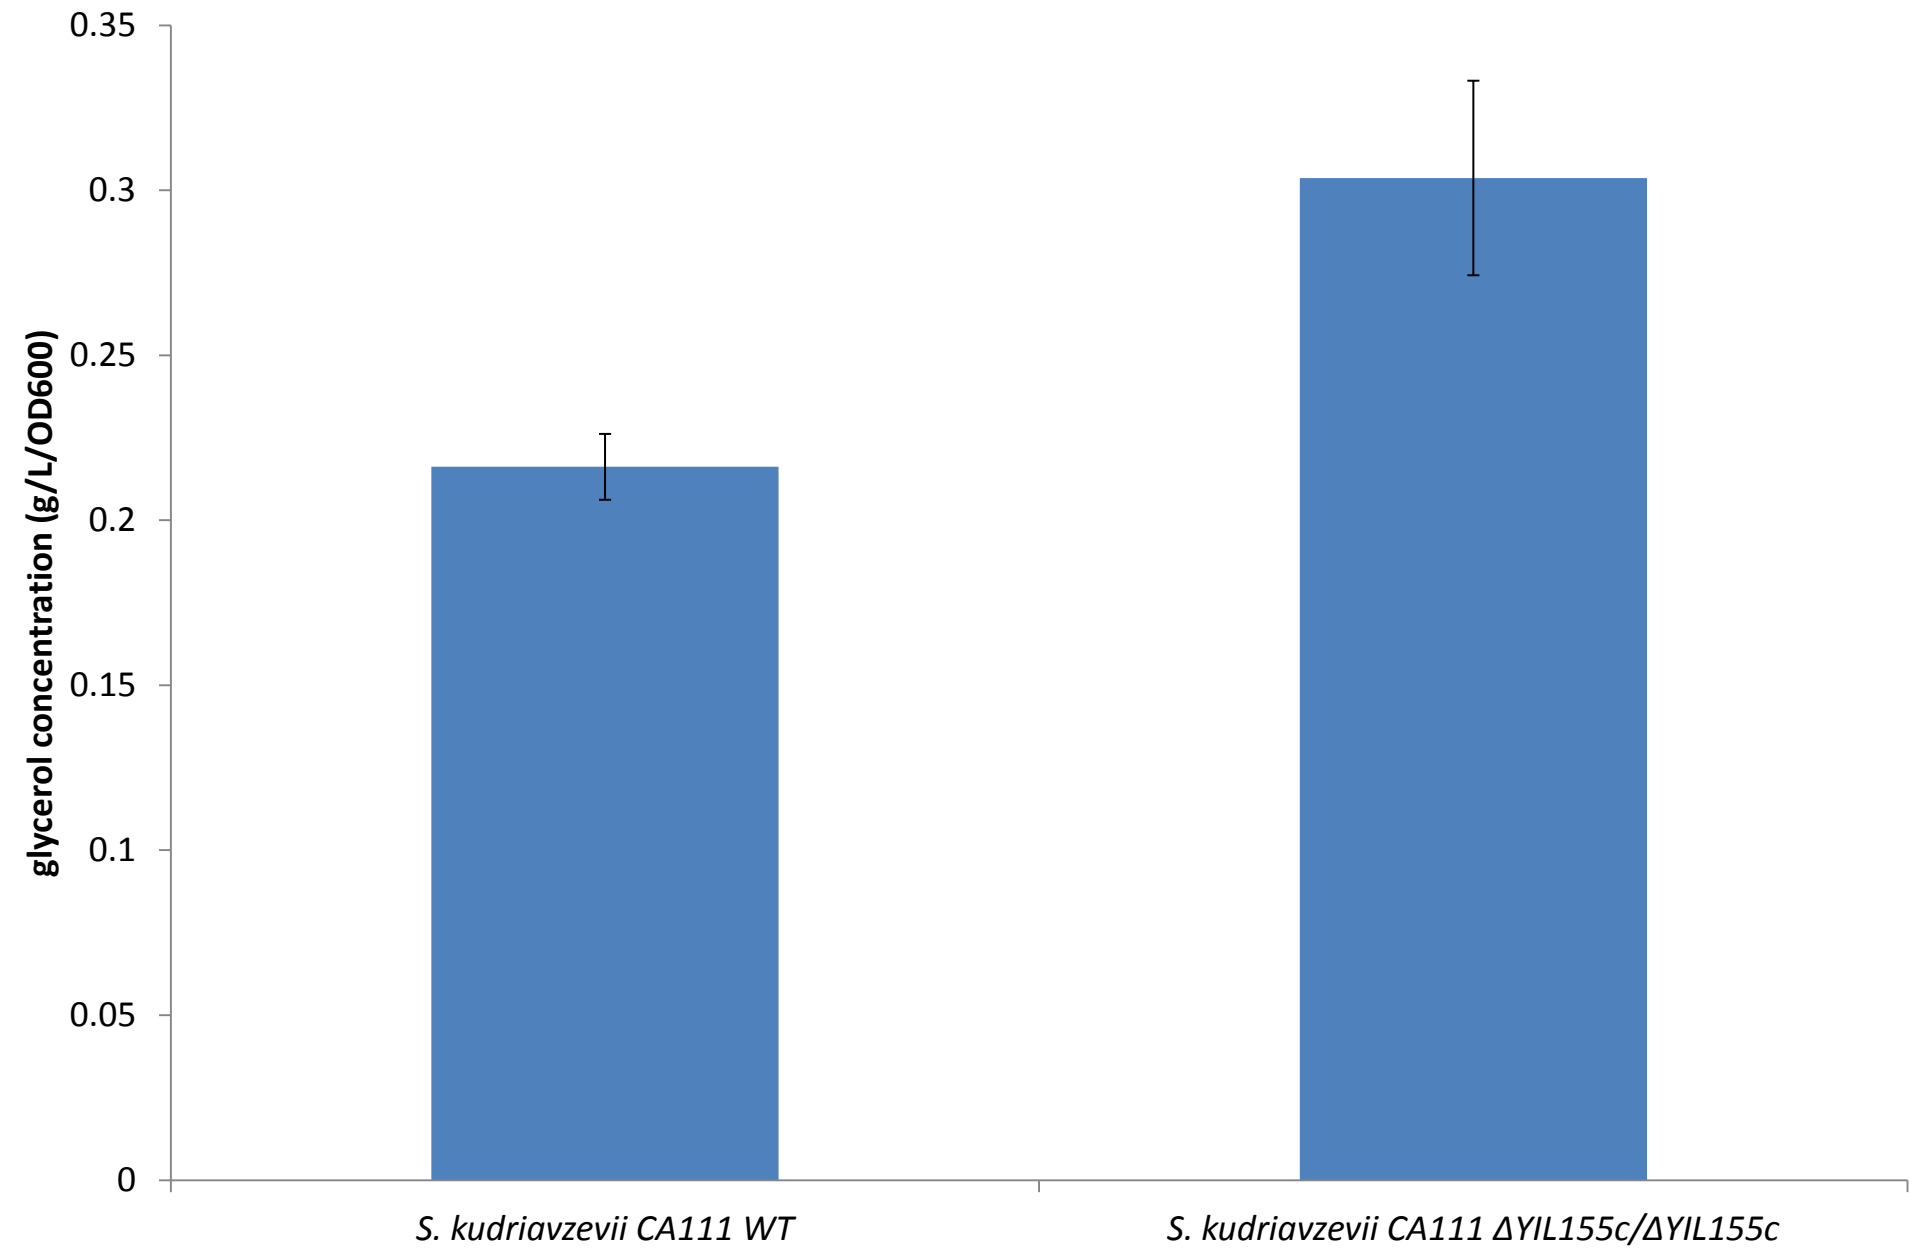

Supplement: mec0023-5241-SD3.pdf [file mec0023-5241-SD3.pdf]
